# Supplementary material for: Effects of alkali metal promoters on the structure–performance relationship of CoMn catalysts for Fischer–Tropsch synthesis
Source: Royal Society of Chemistry journal article supplement (doi:10.1039/c9cy02441g), 2020-01-01
Supplement: c9cy02441g1.pdf [file c9cy02441g1.pdf]

## Supporting Information

# Effects of alkali metal promoters on the structure-performance relationship of CoMn catalysts for Fischer-Tropsch synthesis

*Zhengjia Li*<sup>a,b,c</sup>, *Nan Yao*<sup>a</sup>, *Jie Cen*<sup>a</sup>, *Xiaonian Li*<sup>a,\*</sup>, *Liangshu Zhong*<sup>b,\*</sup>, *Yuhan Sun*<sup>b</sup>, *Mingyuan He*<sup>c</sup>

<sup>a</sup> Institute of Industrial Catalysis, College of Chemical Engineering, Zhejiang University of Technology, Hangzhou 310014, China

<sup>b</sup> CAS Key Laboratory of Low-carbon Conversion Science & Engineering, Shanghai Advanced Research Institute, Chinese Academy of Sciences, Shanghai 201210, PR China

<sup>c</sup> School of Chemistry and Molecular Engineering, East China Normal University, Shanghai 200062, PR China

## Table of Contents

|                                                                    |     |
|--------------------------------------------------------------------|-----|
| Table S1: Ionic potential.....                                     | S3  |
| Table S2: Elements analysis.....                                   | S3  |
| Table S3: Textural properties.....                                 | S3  |
| Table S4: Catalytic performance.....                               | S4  |
| Table S5: Catalytic performance.....                               | S4  |
| Figure S1: MS signals.....                                         | S5  |
| Figure S2: XRD patterns of the calcined and reduced catalysts..... | S5  |
| Figure S3: XRD patterns and peak fitting results.....              | S6  |
| Figure S4: TEM images of the reduced catalysts.....                | S7  |
| Figure S5: Catalytic performance.....                              | S8  |
| Figure S6: Catalytic performance.....                              | S9  |
| Figure S7: Product distributions.....                              | S10 |
| Figure S8: Product distributions.....                              | S10 |
| Figure S9: Catalytic performance.....                              | S11 |
| Figure S10: Product distributions.....                             | S12 |

**Table S1.** Ionic potential of alkali metal ions.

| Ion             | Ionic Potential |
|-----------------|-----------------|
| Li <sup>+</sup> | 1.6641          |
| Na <sup>+</sup> | 1.0404          |
| K <sup>+</sup>  | 0.7569          |
| Rb <sup>+</sup> | 0.6724          |

**Table S2.** Elements analysis of the unpromoted and alkali metal promoted CoMn catalysts.

| Sample  | Alkali concentrations (wt.%) <sup>a</sup> | Alkali concentrations (wt.%) <sup>b</sup> | Co/Mn <sup>b</sup> |
|---------|-------------------------------------------|-------------------------------------------|--------------------|
| CoMn    | 0.0                                       | 0.006 <sup>c</sup>                        | 2.02               |
| CoMn-Li | 0.4                                       | 0.39                                      | 2.08               |
| CoMn-Na | 0.4                                       | 0.37                                      | 2.09               |
| CoMn-K  | 0.4                                       | 0.43                                      | 2.08               |
| CoMn-Rb | 0.4                                       | 0.50                                      | 2.12               |

<sup>a</sup> Nominal loadings, <sup>b</sup> Atomic ratio measured with ICP, <sup>c</sup> Sodium concentration.

**Table S3.** Textural properties of the unpromoted and alkali metal promoted CoMn catalysts.

| Sample  | BET Surface Area (m <sup>2</sup> /g) |       | Pore Volume (cm <sup>3</sup> /g) |       | Pore Diameter (nm) |       |
|---------|--------------------------------------|-------|----------------------------------|-------|--------------------|-------|
|         | Reduced                              | Spent | Reduced                          | Spent | Reduced            | Spent |
| CoMn    | 51.1                                 | 56.5  | 0.19                             | 0.18  | 11.7               | 11.3  |
| CoMn-Li | 62.1                                 | 25.9  | 0.21                             | 0.14  | 11.4               | 12.1  |
| CoMn-Na | 57.8                                 | 47.7  | 0.20                             | 0.17  | 11.6               | 11.0  |
| CoMn-K  | 53.5                                 | 55.6  | 0.17                             | 0.24  | 11.3               | 12.7  |
| CoMn-Rb | 45.3                                 | 59.1  | 0.18                             | 0.23  | 12.5               | 12.2  |

**Table S4.** Catalytic performance of the unpromoted and promoted CoMn catalyst at 250 °C, 1 bar, 3000 mL/(h g<sub>cat</sub>), and H<sub>2</sub>/CO = 2 (v/v).

| Catalyst | CO Conv.<br>(C%) | CO <sub>2</sub> Sele.<br>(C%) | Product Selectivity (C%, CO <sub>2</sub> -free) |                             |                             |                             |                               |                       | O/P Ratios     |                |                |                  |
|----------|------------------|-------------------------------|-------------------------------------------------|-----------------------------|-----------------------------|-----------------------------|-------------------------------|-----------------------|----------------|----------------|----------------|------------------|
|          |                  |                               | CH <sub>4</sub>                                 | C <sub>2</sub> <sup>=</sup> | C <sub>3</sub> <sup>=</sup> | C <sub>4</sub> <sup>=</sup> | C <sub>2-4</sub> <sup>=</sup> | C <sub>5+</sub> + Oxy | C <sub>2</sub> | C <sub>3</sub> | C <sub>4</sub> | C <sub>2-4</sub> |
| CoMn     | 69.2             | 14.9                          | 24.9                                            | 0.3                         | 6.3                         | 8.5                         | 15.1                          | 44.3                  | 0.1            | 1.0            | 1.9            | 1.0              |
| CoMn-Li  | 36.7             | 32.8                          | 26.9                                            | 1.4                         | 7.5                         | 4.5                         | 13.4                          | 40.1                  | 0.1            | 1.0            | 1.9            | 0.7              |
| CoMn-Na  | 16.4             | 42.0                          | 4.1                                             | 10.5                        | 26.5                        | 12.0                        | 49.0                          | 45.2                  | 17.8           | 40.4           | 29.1           | 29.5             |
| CoMn-K   | 6.4              | 34.3                          | 9.3                                             | 13.0                        | 25.3                        | 9.6                         | 47.9                          | 41.0                  | 19.7           | 32.7           | 24.1           | 26.1             |
| CoMn-Rb  | 8.1              | 16.6                          | 13.1                                            | 9.5                         | 26.6                        | 10.5                        | 46.5                          | 36.6                  | 6.5            | 18.1           | 12.4           | 12.3             |

**Table S5.** Catalytic performance of the unpromoted and promoted CoMn catalyst at different GHSV, 250 °C, 1 bar, and H<sub>2</sub>/CO = 2 (v/v).

| GHSV (mL/(h·g <sub>cat</sub> )) | CO Conv. (C%) | CO <sub>2</sub> Sele. (C%) | Product Selectivity (C%, CO <sub>2</sub> -free) |                               |                       |
|---------------------------------|---------------|----------------------------|-------------------------------------------------|-------------------------------|-----------------------|
|                                 |               |                            | CH <sub>4</sub>                                 | C <sub>2-4</sub> <sup>=</sup> | C <sub>5+</sub> + Oxy |
| 3000                            | 15.5          | 45.6                       | 6.0                                             | 52.3                          | 39.8                  |
| 4500                            | 13.8          | 44.8                       | 6.7                                             | 55.6                          | 34.8                  |
| 6000                            | 9.5           | 42.2                       | 6.1                                             | 52.8                          | 38.9                  |

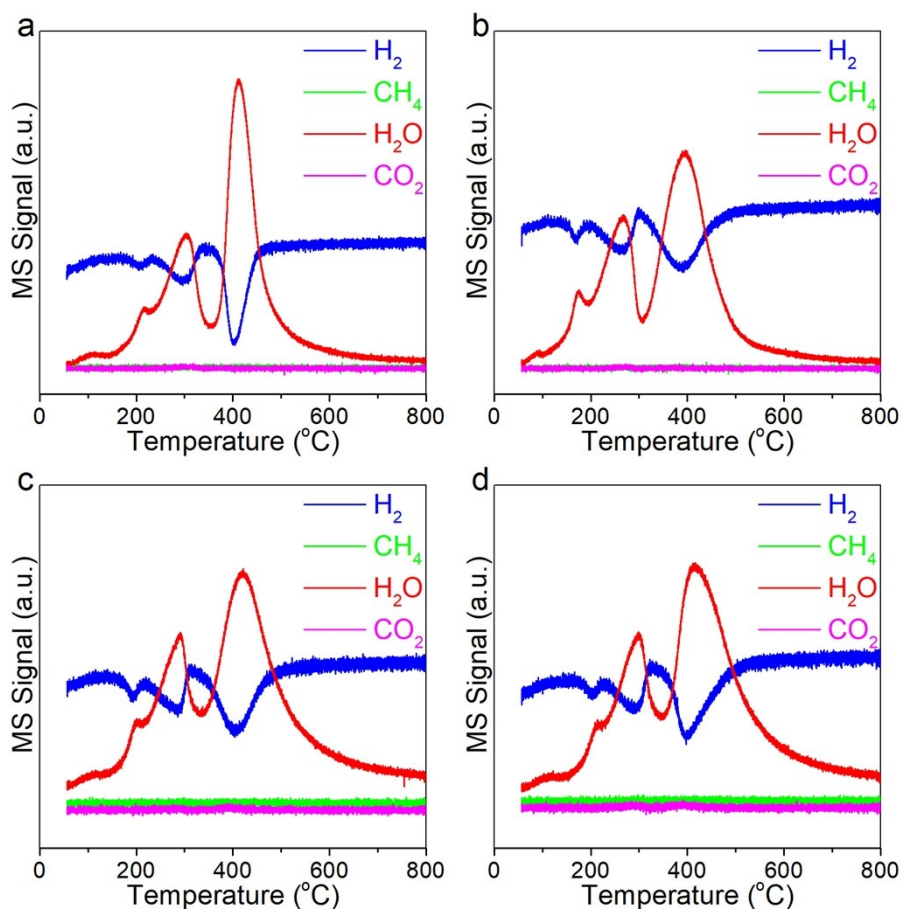

**Figure S1.** MS signals of the alkali metal promoted CoMn catalysts in H<sub>2</sub>-TPR: (a) CoMn-Li; (b) CoMn-Na; (c) CoMn-K; (d) CoMn-Rb.

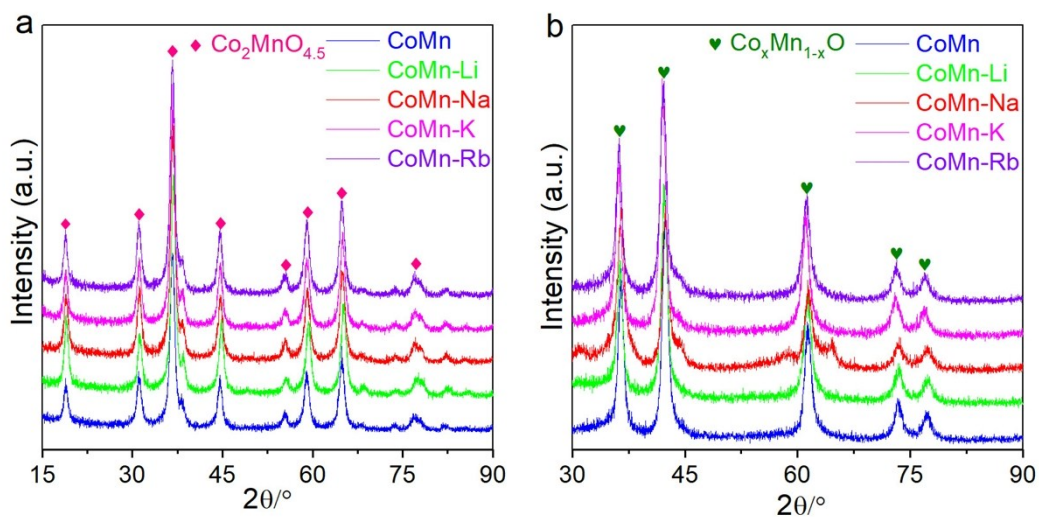

**Figure S2.** XRD patterns of the calcined and reduced CoMn catalysts with different alkali metal promoters: (a) the calcined catalysts; (b) the reduced catalysts.

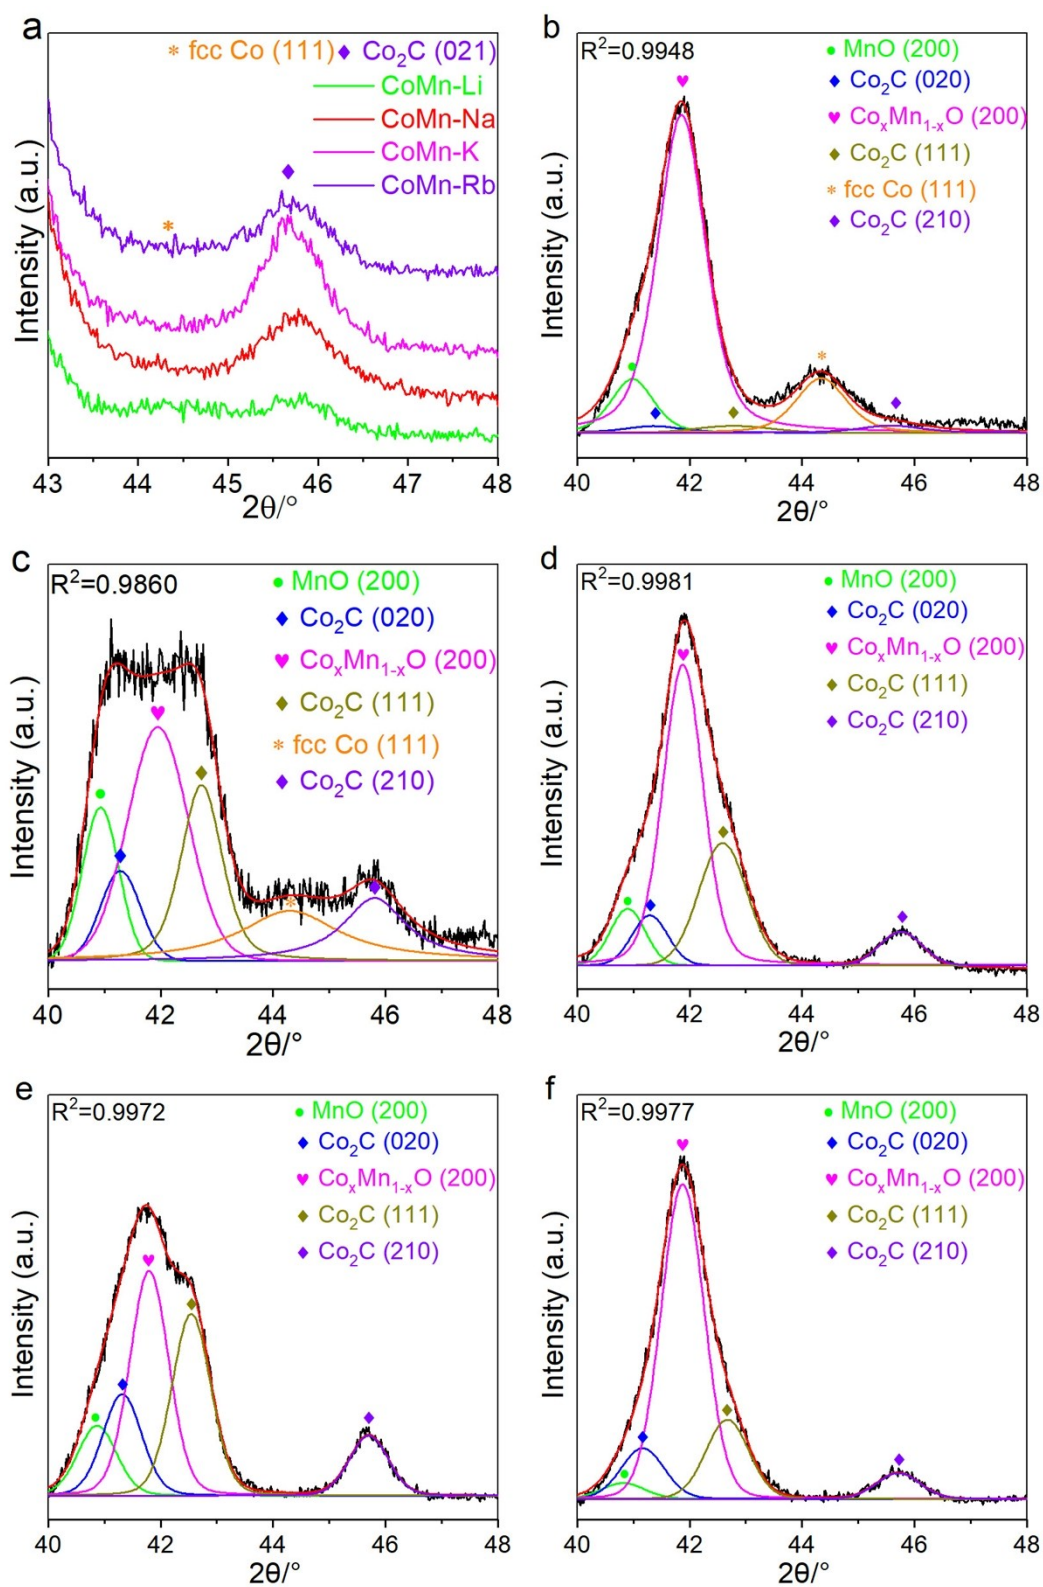

**Figure S3.** XRD patterns and peak fitting results of the spent CoMn catalysts with different alkali metal promoters: (a) step scanning with  $2\theta$  from  $43^\circ$  to  $48^\circ$ ; (b) CoMn; (c) CoMn-Li; (d) CoMn-Na; (e) CoMn-K; (f) CoMn-Rb. TOS = 24 h for all samples.



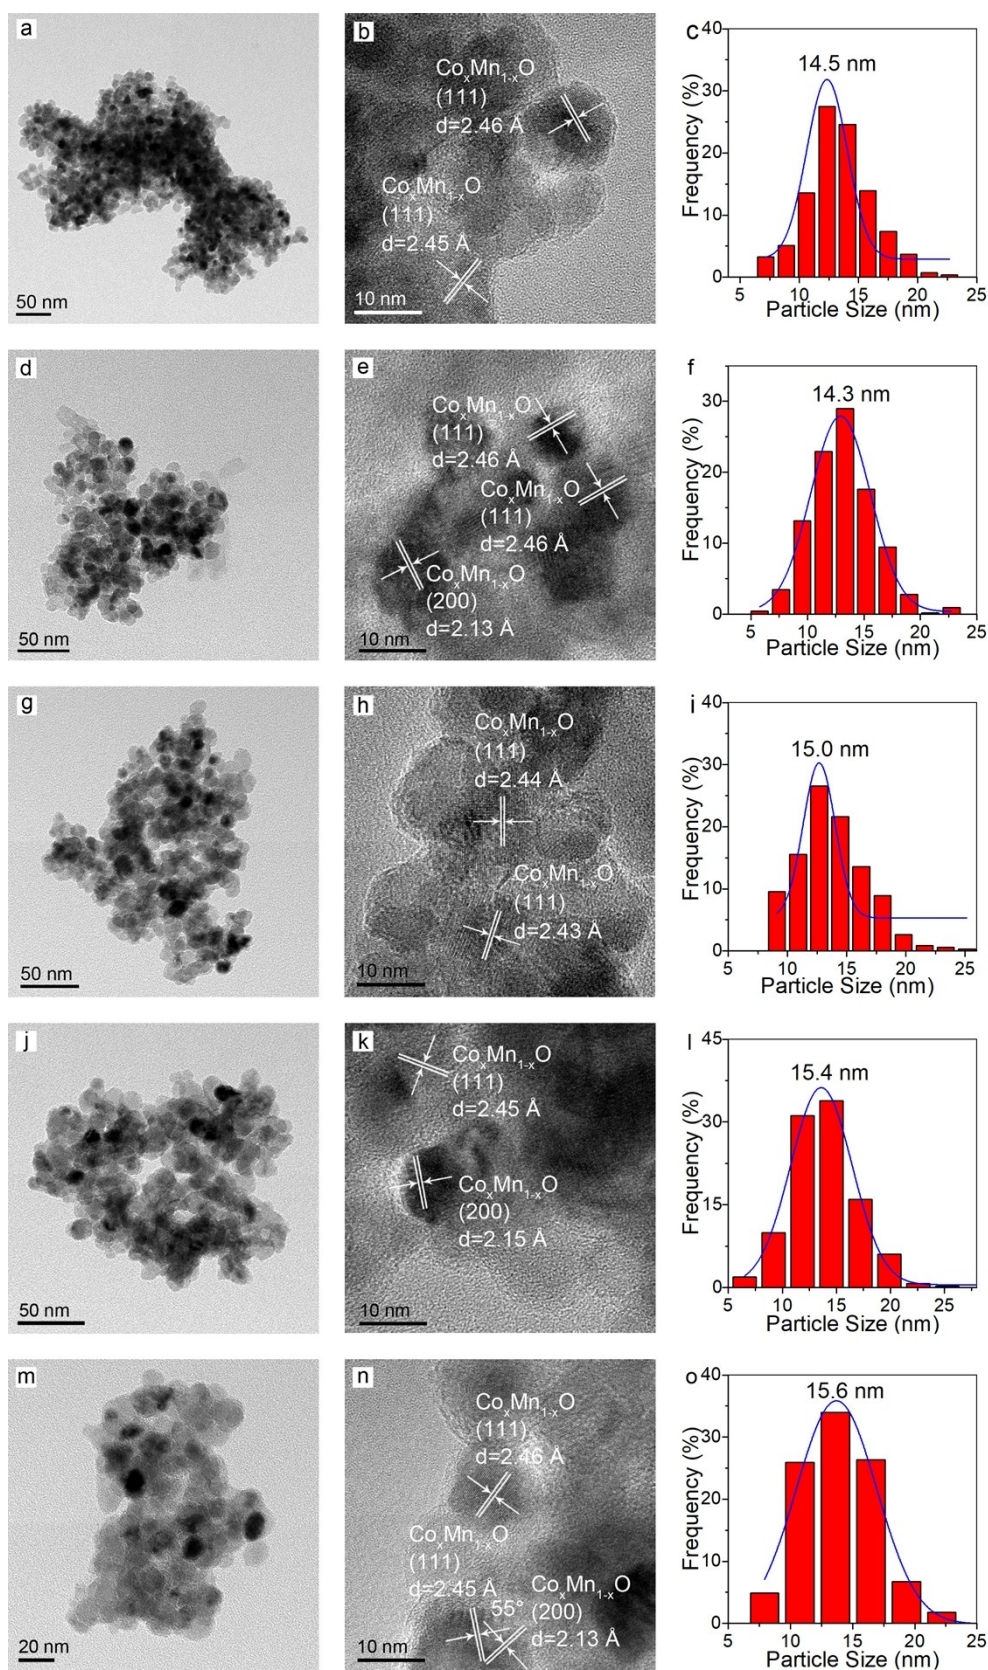

**Figure S4.** TEM images of the reduced CoMn catalysts with different alkali metal promoters: (a-c) CoMn; (d-f) CoMn-Li; (g-i) CoMn-Na; (j-l) CoMn-K; (m-o) CoMn-Rb.

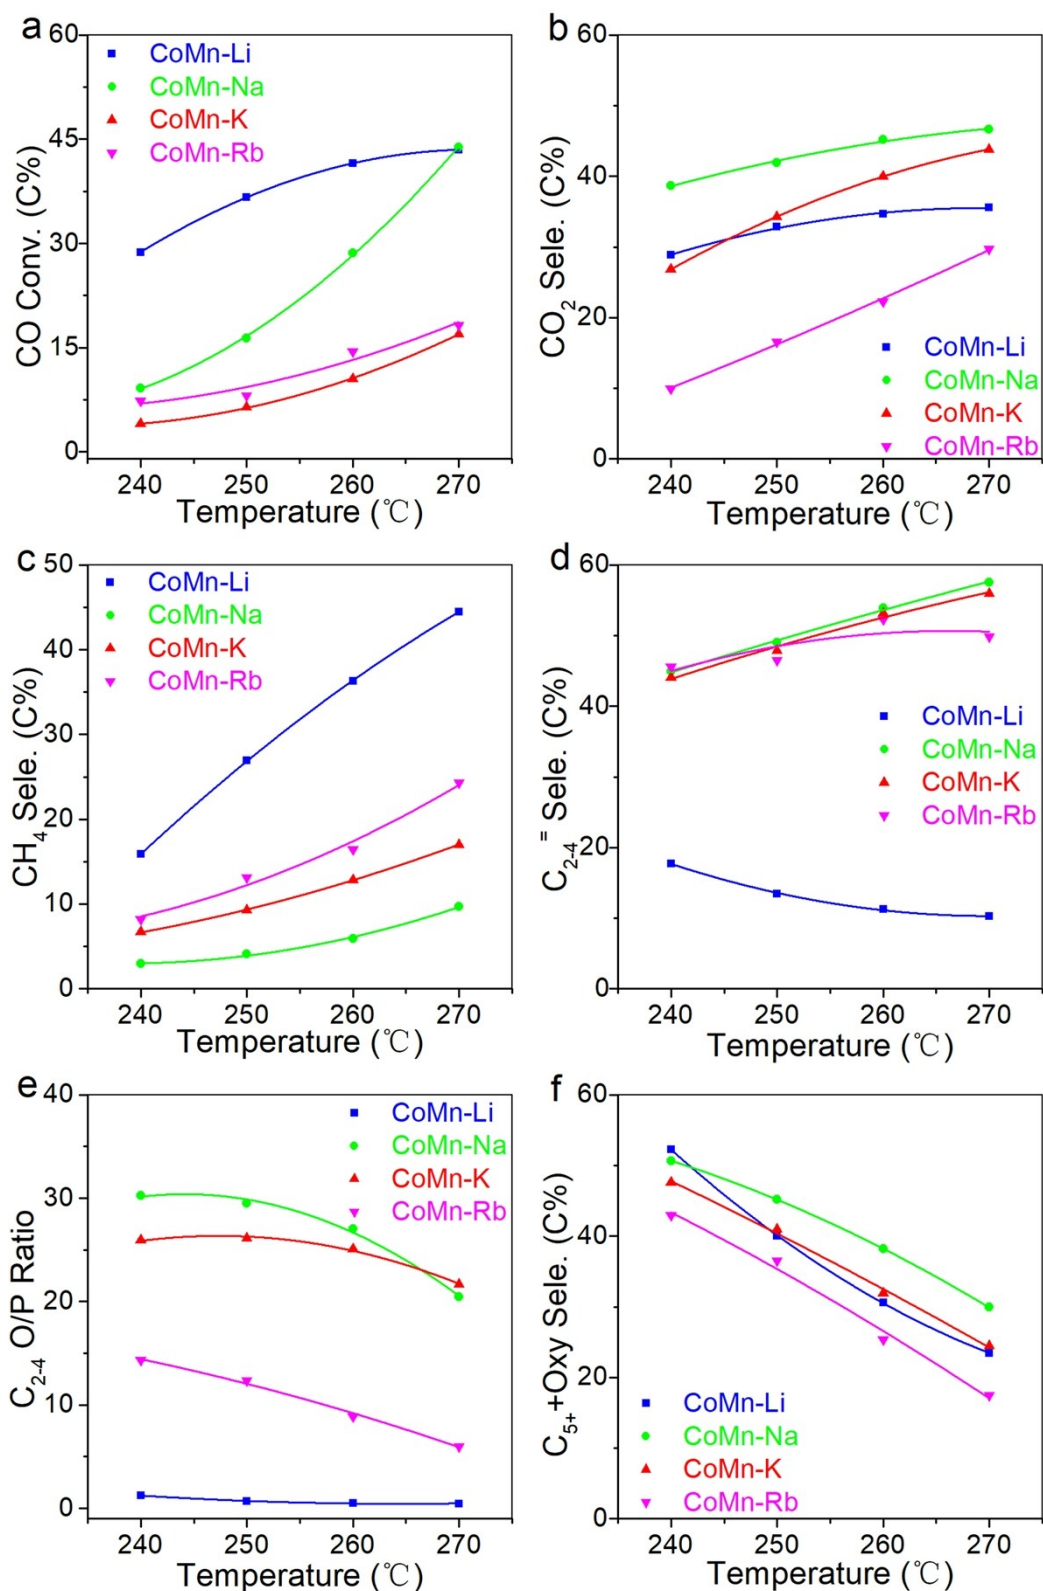

**Figure S5.** Catalytic performance of the CoMn catalysts with different alkali metal promoters at different temperatures, 1 bar, 3000 ml/(h·g<sub>cat</sub>), H<sub>2</sub>/CO=2: (a) CO conversion; (b) CO<sub>2</sub> selectivity; (c) CH<sub>4</sub> selectivity; (d) Lower olefin selectivity; (e) O/P ratios of C<sub>2-4</sub>; (f) C<sub>5+</sub> + Oxy selectivity.



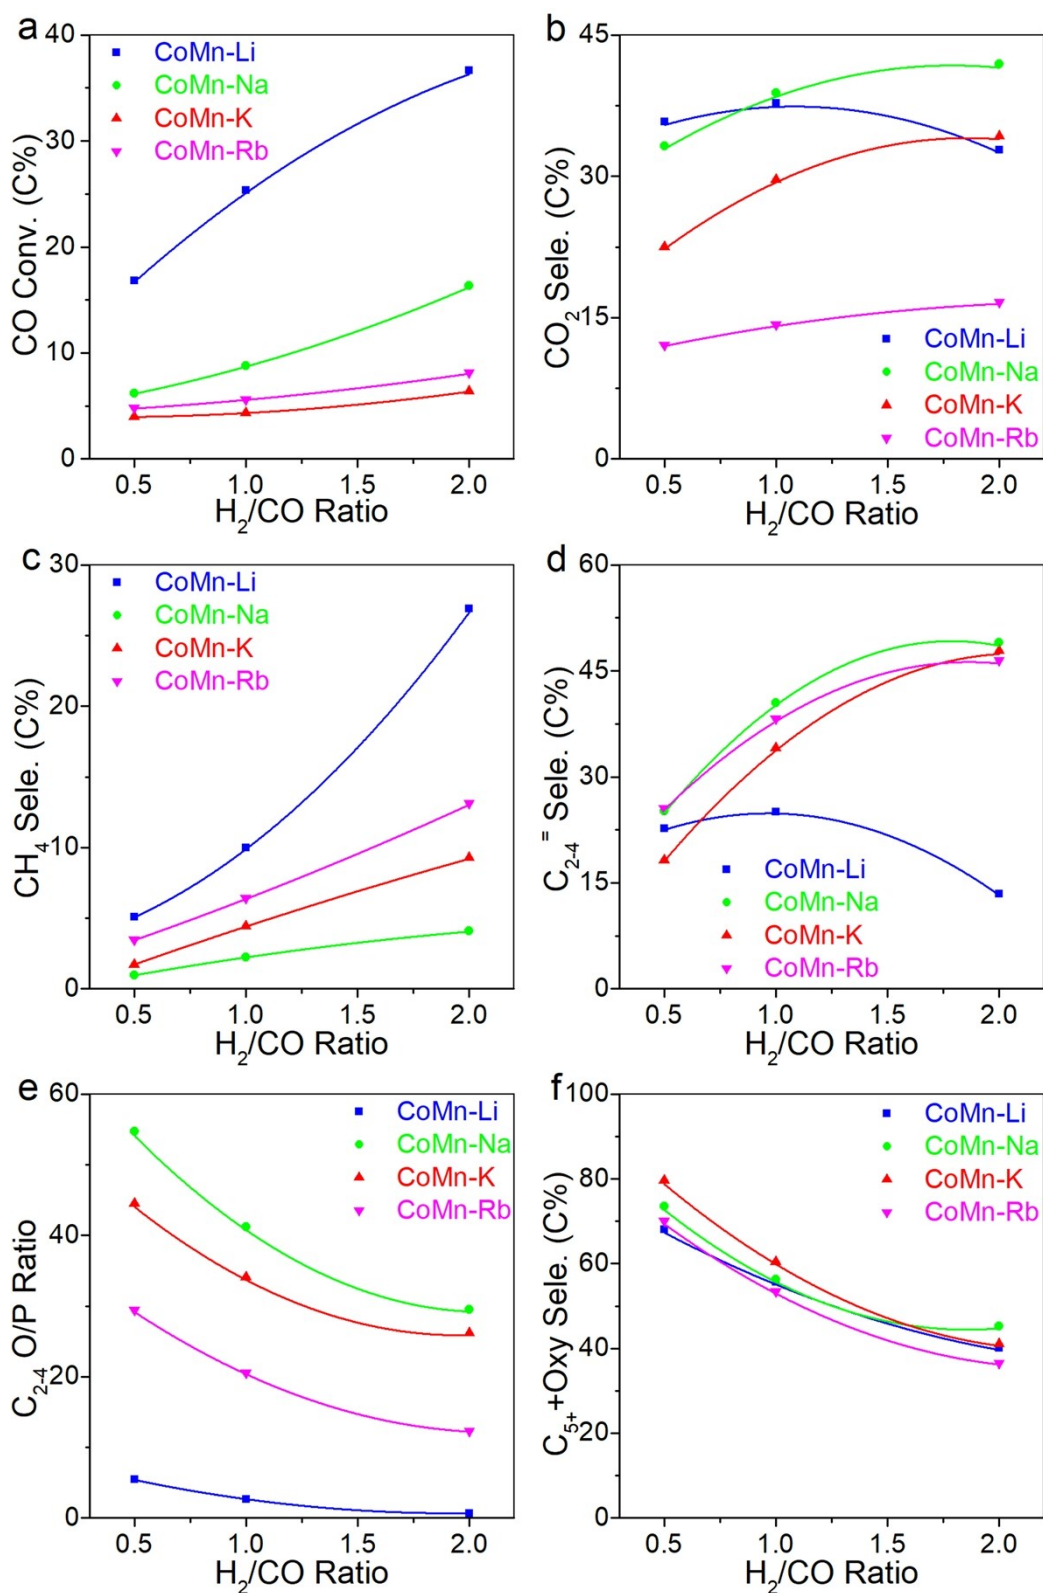

**Figure S6.** Catalytic performance of the CoMn catalysts with different alkali metal promoters at different H<sub>2</sub>/CO ratios, 250 °C, 1 bar, 3000 ml/(h·g<sub>cat</sub>): (a) CO conversion; (b) CO<sub>2</sub> selectivity; (c) CH<sub>4</sub> selectivity; (d) Lower olefin selectivity; (e) O/P ratios of C<sub>2-4</sub>; (f) C<sub>5+</sub> + Oxy selectivity.

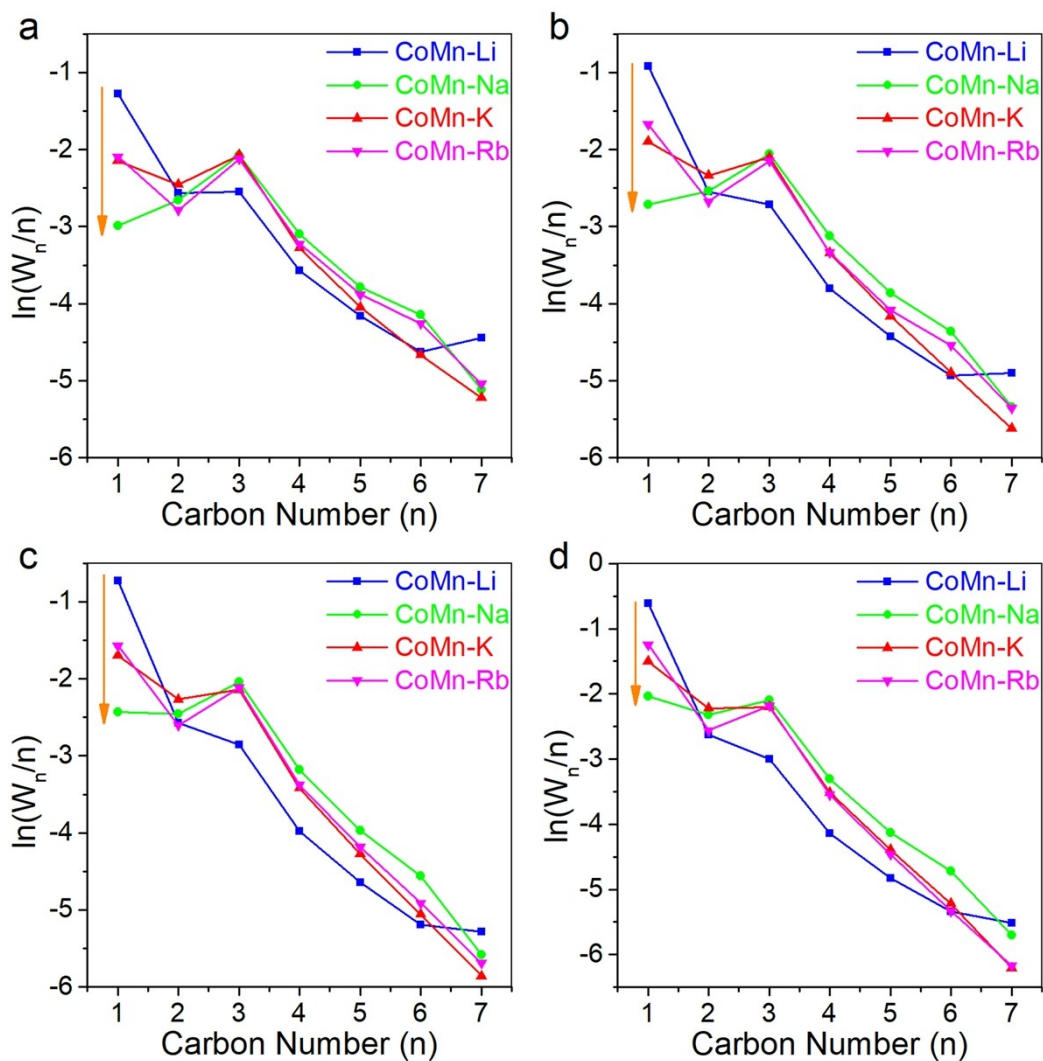

**Figure S7.** Product distributions of the CoMn catalysts with different alkali metal promoters at different temperatures, 1 bar, 3000 ml/(h·g<sub>cat</sub>), H<sub>2</sub>/CO=2: (a) 240 °C; (b) 250 °C; (c) 260 °C; (d) 270 °C.

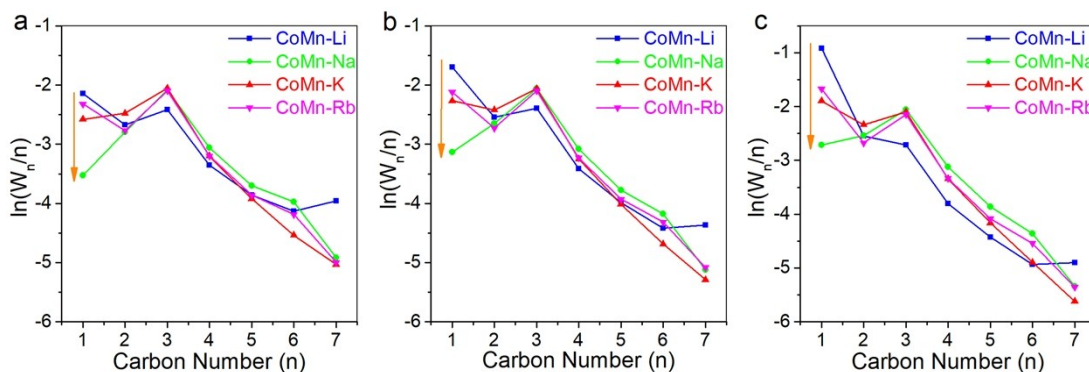

**Figure S8.** Product distributions of the CoMn catalysts with different alkali metal promoters at different H<sub>2</sub>/CO ratios, 250 °C, 1 bar, 3000 ml/(h·g<sub>cat</sub>): (a) H<sub>2</sub>/CO=0.5; (b) H<sub>2</sub>/CO=1; (c) H<sub>2</sub>/CO=2.

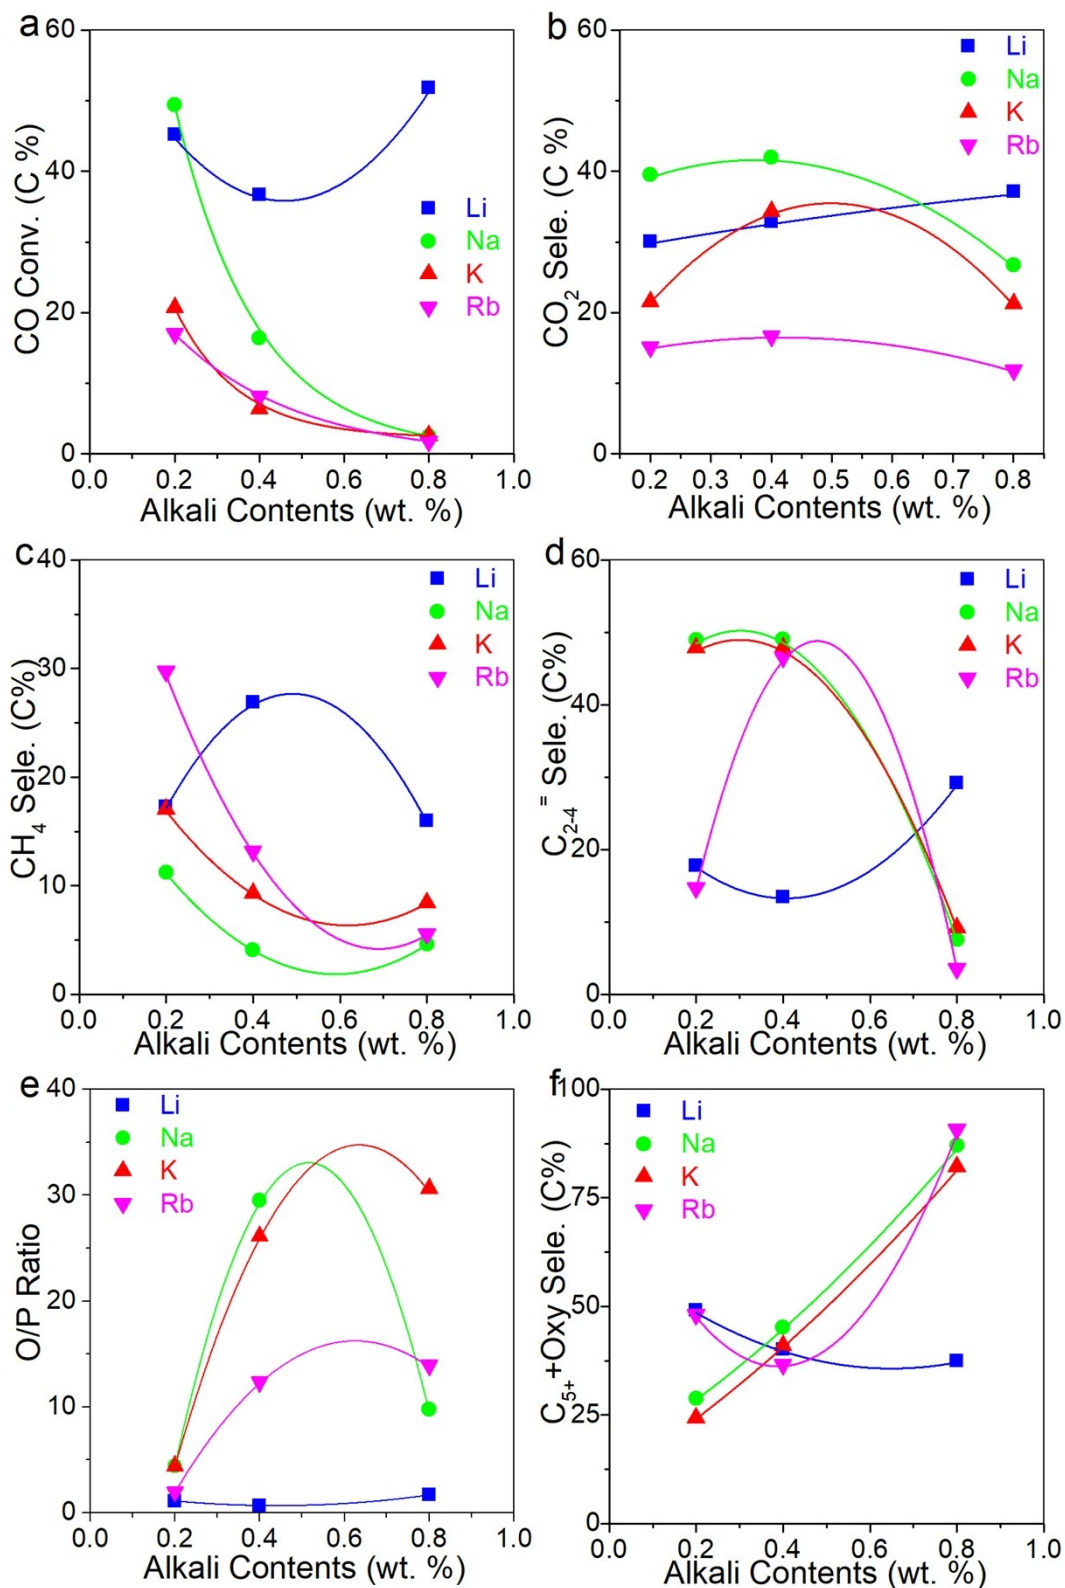

**Figure S9.** Catalytic performance of the alkali metal promoted CoMn catalysts with different loadings, 250 °C, 1 bar, 3000 ml/(h·g<sub>cat</sub>), H<sub>2</sub>/CO=2: (a) CO conversion; (b) CO<sub>2</sub> selectivity; (c) CH<sub>4</sub> selectivity; (d) Lower olefin selectivity; (e) O/P ratios of C<sub>2-4</sub>; (f) C<sub>5+</sub> + Oxy selectivity.

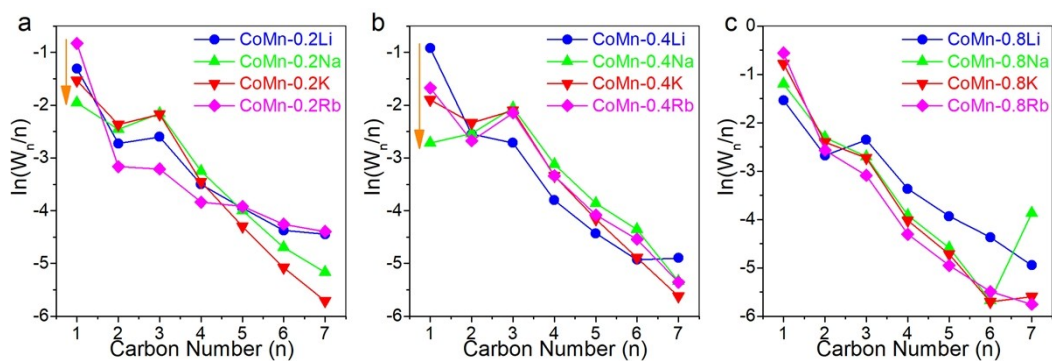

**Figure S10.** Product distributions of the alkali metal promoted CoMn catalysts with different loadings, 250 °C, 1 bar, 3000 ml/(h·g<sub>cat</sub>), H<sub>2</sub>/CO=2: (a) 0.2 wt.%; (b) 0.4 wt.%; (c) 0.8 wt.%.
